# Supplementary material for: Productivity, efficiency, and overall performance comparisons between attendings working solo versus attendings working with residents staffing models in an emergency department: A Large-Scale Retrospective Observational Study
Source: PubMed Central journal article supplement (PMC7001986; doi:10.1371/journal.pone.0228719), 2020-02-05
Supplement: pone.0228719.s006.pdf [file pone.0228719.s006.pdf]

Initial Data including 49 ED Attending Physicians and 271 Residents Enrolled During Study Period

Part-time Attending Physicians who worked less than average 2 shifts per months were excluded (N=14)

35 Attending Physicians and 271 Residents Included During Study Period

Attending Physicians who either worked only with residents or worked alone were excluded (N=4)

31 Attending Physicians and 271 Residents Included During Study Period

Attending Physicians who did not have balanced shifts were excluded (N=16)

Final Data Analysis including 15 Attending Physicians and 266 Residents with Total 111,154 Patient Visits During Study Period

S1 Appendix Fig – Study Flow Diagram
